# Supplementary material for: Extracorporeal Photopheresis in Dermatological Diseases
Source: MDPI journal article supplement (doi:10.3390/ijms25053011), 2024-03-05
Supplement: s1 [file s1]

## Supplementary Files for Extracorporeal Photopheresis in Dermatological Diseases

**Supplementary Table S1.** APSA Guideline for Therapy Staging.

| Category   | Definition                                                                                                              |
|------------|-------------------------------------------------------------------------------------------------------------------------|
| <b>I</b>   | Considered as <b>first-line</b> treatment; used as monotherapy or concomitant treatment                                 |
| <b>II</b>  | Considered a <b>second-line</b> treatment; used as monotherapy or concomitant treatment                                 |
| <b>III</b> | Literature shows beneficial treatment but insufficient evidence.<br>Treatment decision is based on individual scenario. |
| <b>IV</b>  | Literature states ECP is harmful or ineffective.<br>IRB approval is needed in order to administer treatment             |

**Supplementary Table S2.** APSA Guideline for Strength and Quality of Evidence.

| Grading Recommendation | Quality                                                  | Implementation                                                                        |
|------------------------|----------------------------------------------------------|---------------------------------------------------------------------------------------|
| <b>Grade 1A</b>        | Strong recommendation with high quality evidence         | Can apply to most patients without concern                                            |
| <b>Grade 1B</b>        | Strong recommendation with intermediate quality evidence | Can apply to most patients without concern                                            |
| <b>Grade 1C</b>        | Weak recommendation with high quality evidence           | Strongly recommended but recommendation can change as more evidence becomes available |
| <b>Grade 2A</b>        | Weak recommendation with high quality evidence           | Application dependent on circumstance and patient's preference                        |
| <b>Grade 2B</b>        | Weak recommendation with intermediate-quality evidence   | Application dependent on case-by-case basis and patient's preference                  |
| <b>Grade 2C</b>        | Weak recommendation with low-quality or very low-quality | Other alternatives should be considered                                               |
